# Supplementary material
Source: PubMed Central journal article supplement (PMC4957521)
Supplement: NIHMS780842-supplement-sup1.pdf [file NIHMS780842-supplement-sup1.pdf]

Table 1: Trained Tasks: Group performance during Baseline and Follow-Up sessions, as well as the Benefit Indices per task and the overall Composite Benefit Index. The values represent group means, and the standard error of the mean is shown in parentheses. As a reminder, the Composite Benefit Index reflects the average benefit index for all trained tasks.

| Baseline (Day 2) |            |           |              |            |
|------------------|------------|-----------|--------------|------------|
| Group            | WM Spatial | WM Visual | OSPAN        | Subtract2  |
| Sham             | .36 (.03)  | .52 (.03) | 11.26 (1.80) | 4.70 (.21) |
| Active1          | .42 (.03)  | .53 (.02) | 16.00 (2.27) | 4.73 (.15) |
| Active2          | .42 (.03)  | .52 (.03) | 13.70 (2.22) | 4.77 (.09) |

  

| Follow-Up (Day 7) |            |           |              |            |
|-------------------|------------|-----------|--------------|------------|
| Group             | WM Spatial | WM Visual | OSPAN        | Subtract2  |
| Sham              | .42 (.03)  | .64 (.03) | 15.63 (2.16) | 5.12 (.18) |
| Active1           | .54 (.03)  | .68 (.03) | 19.23 (2.20) | 4.97 (.18) |
| Active2           | .53 (.03)  | .65 (.04) | 19.53 (2.18) | 5.13 (.20) |

  

| Benefit Indices (Day 7 - Day 2)/(Day 7 + Day 2) |            |           |           |           |
|-------------------------------------------------|------------|-----------|-----------|-----------|
| Group                                           | WM Spatial | WM Visual | OSPAN     | Subtract2 |
| Sham                                            | .06 (.06)  | .07 (.04) | .19 (.08) | .06 (.03) |
| Active1                                         | .16 (.05)  | .12 (.02) | .15 (.07) | .02 (.02) |
| Active2                                         | .15 (.03)  | .11 (.02) | .18 (.09) | .03 (.02) |

  

| Composite Benefit Index |           |
|-------------------------|-----------|
| Group                   |           |
| Sham                    | .10 (.04) |
| Active1                 | .12 (.02) |
| Active2                 | .12 (.03) |

  

ANOVA  $F(2, 89) = .20, p = .82, \text{partial } \eta^2 = .047$

Table 2: Near Transfer Tasks: Group performance during Baseline and Follow-Up sessions, as well as the Benefit Indices per task and the overall Composite Benefit Index. The values represent group means, and the standard error of the mean is shown in parentheses. As a reminder, the Composite Benefit Index reflects the average benefit index for all near transfer tasks.

| Baseline (Day 2)                                |                                                    |             |
|-------------------------------------------------|----------------------------------------------------|-------------|
| Group                                           | 2-Back                                             | Letter Span |
| Sham                                            | .69 (.04)                                          | 3.70 (.19)  |
| Active1                                         | .78 (.03)                                          | 3.87 (.18)  |
| Active2                                         | .76 (.04)                                          | 4.00 (.15)  |
| Follow-Up (Day 7)                               |                                                    |             |
| Group                                           | 2-Back                                             | Letter Span |
| Sham                                            | .79 (.04)                                          | 3.33 (.20)  |
| Active1                                         | .79 (.04)                                          | 3.7 (.19)   |
| Active2                                         | .86 (.02)                                          | 4 (.17)     |
| Benefit Indices (Day 7 - Day 2)/(Day 7 + Day 2) |                                                    |             |
| Group                                           | 2-Back                                             | Letter Span |
| Sham                                            | .07 (.03)                                          | -.06 (.04)  |
| Active1                                         | -.01 (.03)                                         | -.03 (.03)  |
| Active2                                         | .07 (.03)                                          | .00 (.02)   |
| Composite Benefit Index                         |                                                    |             |
| Group                                           |                                                    |             |
| Sham                                            | .01 (.01)                                          |             |
| Active1                                         | -.02 (.02)                                         |             |
| Active2                                         | .04 (.02)                                          |             |
| ANOVA                                           | F (2, 89) = 1.65, p = .20, partial $\eta^2$ = .037 |             |

Table 3: Standard Far Transfer Tasks: Group performance during Baseline and Follow-Up sessions, as well as the Benefit Indices per task and the overall Composite Benefit Index. The values represent group means, and the standard error of the mean is shown in parentheses. As a reminder, the Composite Benefit Index reflects the average benefit index for all far transfer tasks.

<sup>^</sup> indicates that 2 outliers were removed

|         |                               | Baseline (Day 1) |                       |
|---------|-------------------------------|------------------|-----------------------|
| Group   | Processing Speed <sup>^</sup> | Arithmetic       | Cognitive Flexibility |
| Sham    | 51.15 (1.99)                  | .86 (.02)        | .72 (.01)             |
| Active1 | 55.57 (2.24)                  | .85 (.02)        | .72 (.02)             |
| Active2 | 57.33 (2.12)                  | .86 (.02)        | .72 (.02)             |

  

|         |                               | Follow-Up (Day 8) |                       |
|---------|-------------------------------|-------------------|-----------------------|
| Group   | Processing Speed <sup>^</sup> | Arithmetic        | Cognitive Flexibility |
| Sham    | 54.63 (2.64)                  | .88 (.02)         | .74 (.02)             |
| Active1 | 58.90 (2.39)                  | .90 (.02)         | .76 (.02)             |
| Active2 | 61.97 (2.37)                  | .91 (.02)         | .79 (.02)             |

  

|         |                               | Benefit Indices (Day 8 - Day 1)/(Day 8 + Day 1) |                       |
|---------|-------------------------------|-------------------------------------------------|-----------------------|
| Group   | Processing Speed <sup>^</sup> | Arithmetic                                      | Cognitive Flexibility |
| Sham    | .03 (.02)                     | .01 (.01)                                       | .01 (.01)             |
| Active1 | .03 (.01)                     | .03 (.01)                                       | .02 (.01)             |
| Active2 | .04 (.01)                     | .03 (.01)                                       | .05 (.01)             |

  

| Group   | Composite Benefit Index |
|---------|-------------------------|
| Sham    | .01 (.01)               |
| Active1 | .03 (.01)               |
| Active2 | .04 (.01)               |

  

ANOVA  $F(2, 87) = 3.30, p = .04, \text{partial } \eta^2 = .073$
